# Supplementary material for: A water-stable molecular cadmium phosphonate bearing 2-(2-pyridyl)benzimidazole as a highly sensitive luminescence sensor for the selective detection of bisphenol AF and bisphenol B
Source: Royal Society of Chemistry journal article supplement (doi:10.1039/d0ce01740j), 2021-01-01
Supplement: d0ce01740j1.pdf [file d0ce01740j1.pdf]

## Supporting Information for

**A water stable molecular cadmium phosphonate bearing 2-(2-pyridyl)benzimidazole as a highly sensitive luminescence sensor for selective detection of bisphenol AF and bisphenol B**

**Jing-Yun Wu,<sup>a</sup> Zhi-Jia Hu,<sup>a</sup> and Hui-Ling Sung<sup>b,\*</sup>**

<sup>a</sup> Department of Applied Chemistry, National Chi Nan University, Nantou 545, Taiwan.

<sup>b</sup> Division of Preparatory Programs for Overseas Chinese Students, National Taiwan Normal University, New Taipei City 244, Taiwan. E-mail address: [hlsung@ntnu.edu.tw](mailto:hlsung@ntnu.edu.tw)

\*Corresponding Author.

E-mail address: [hlsung@ntnu.edu.tw](mailto:hlsung@ntnu.edu.tw) (H.-L. Sung)

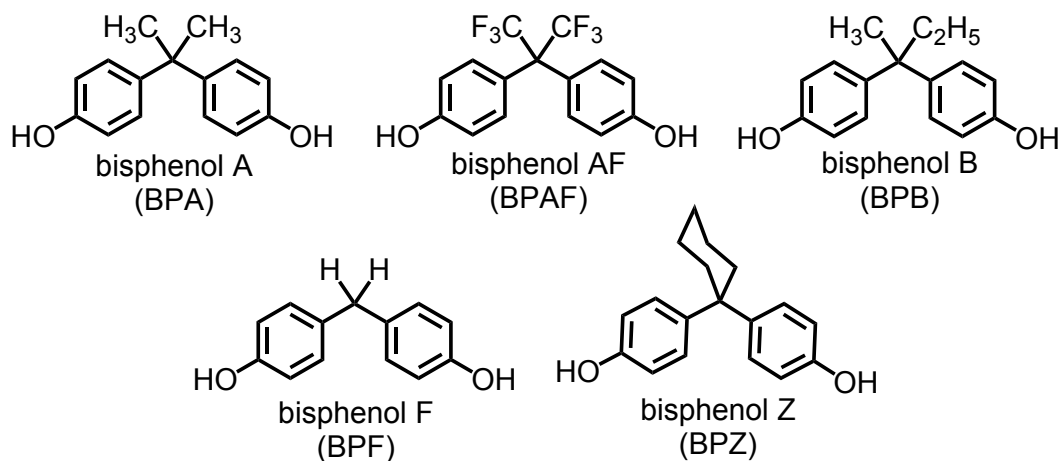

**Scheme S1.** Molecular structures of bisphenol analogues

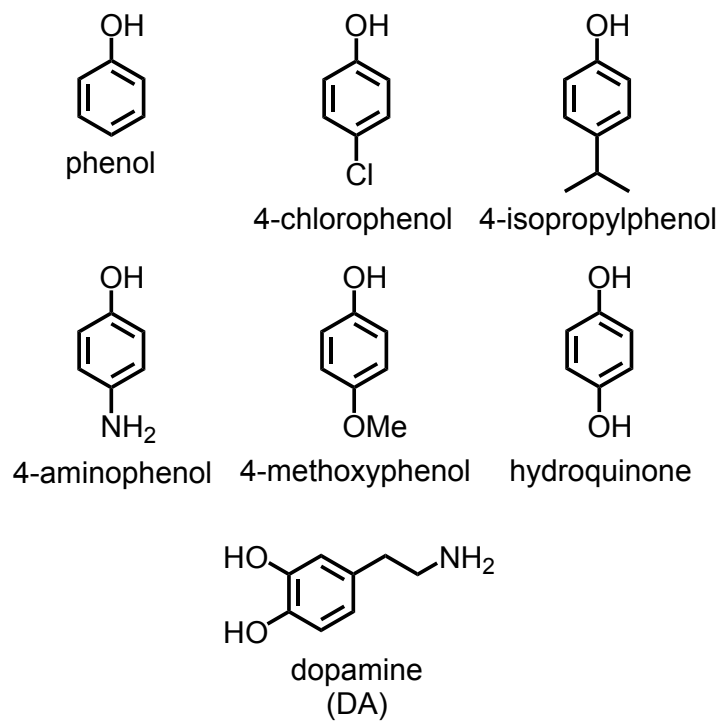

**Scheme S2.** Molecular structures of phenol derivatives and dopamine

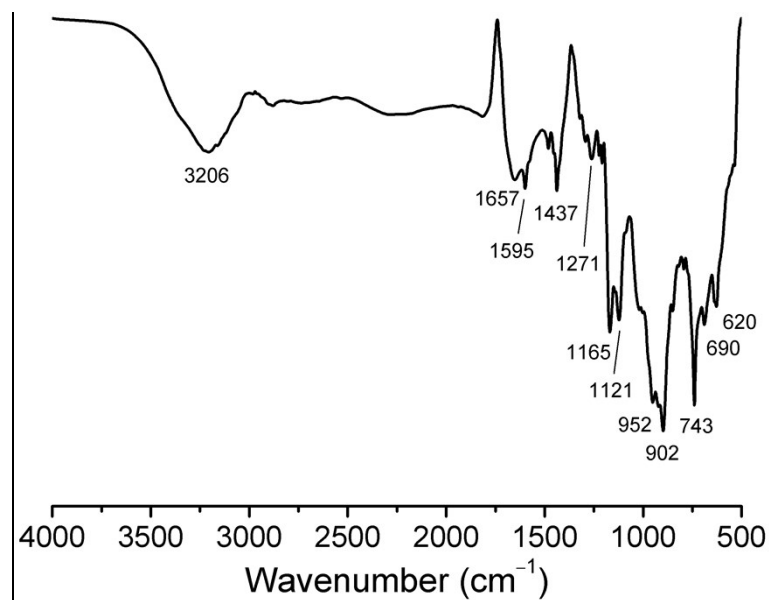

**Fig. S1** IR spectra of  $1 \cdot 2\text{H}_2\text{O}$ .

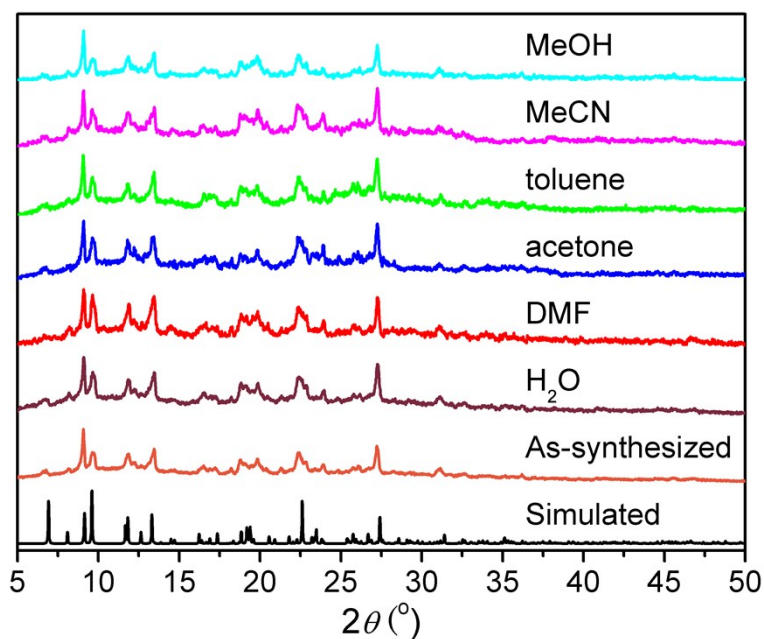

**Fig. S2** Simulated and experimental PXRD patterns of  $1 \cdot 2\text{H}_2\text{O}$  before and after immersing in  $\text{H}_2\text{O}$ , DMF, acetone, toluene, MeCN, and MeOH for 24 h.

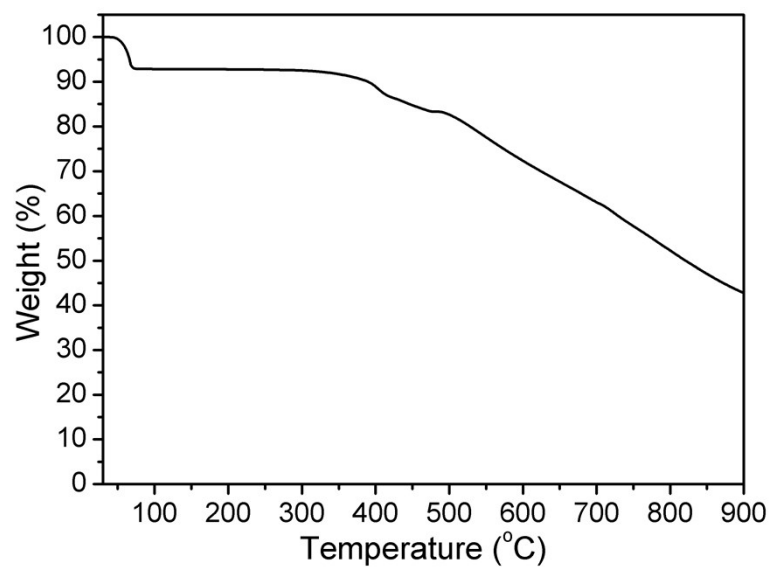

**Fig. S3** TG diagram of  $1 \cdot 2\text{H}_2\text{O}$ .

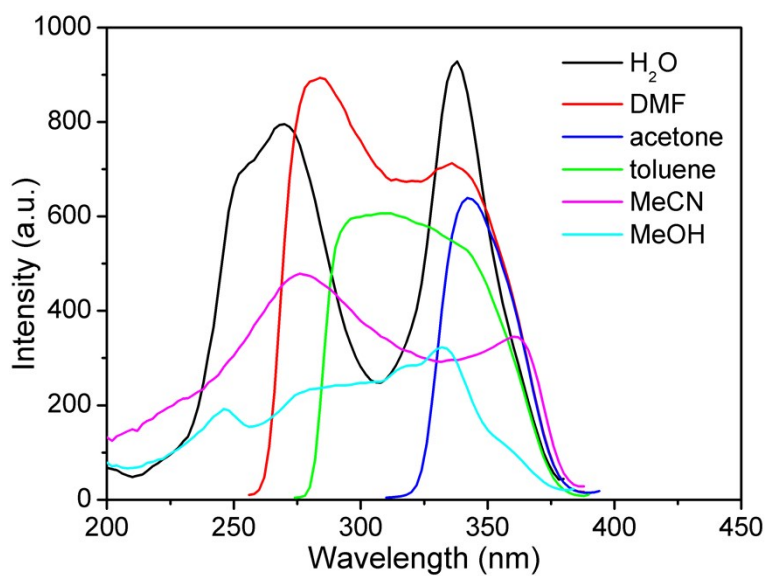

**Fig. S4** Excitation spectra of  $1 \cdot 2\text{H}_2\text{O}$  in different solvent suspensions at room temperature.

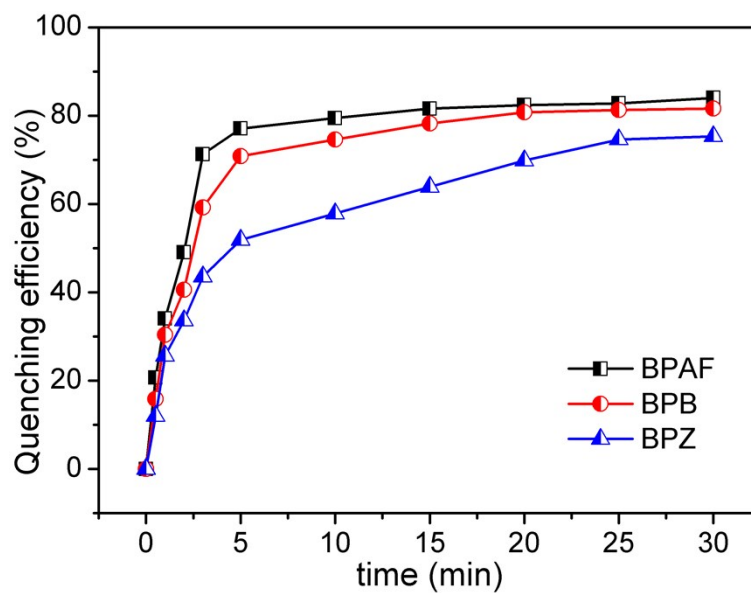

**Fig. S5** The response time of  $1 \cdot 2H_2O$  in  $H_2O$  suspensions to monitor the bisphenols, including BPAF, BPB, and BPZ.

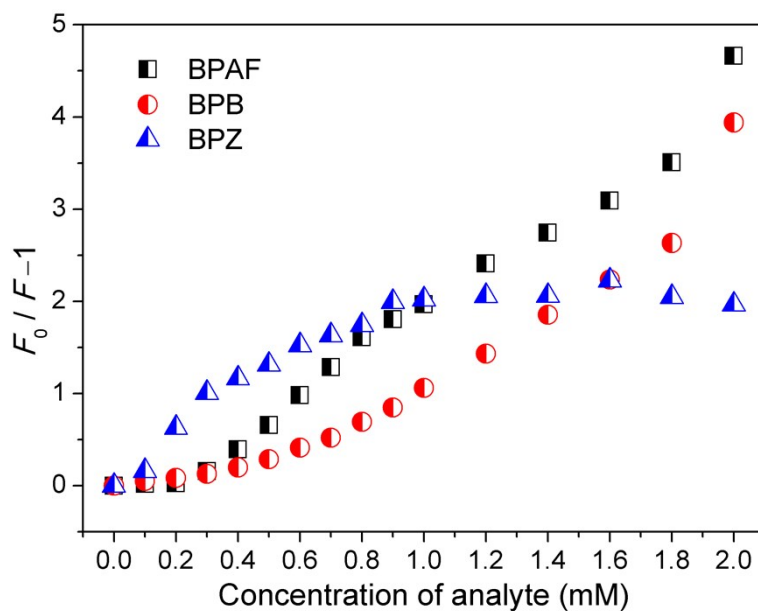

**Fig. S6** Stern–Volmer plots for the luminescence detection of  $1 \cdot 2H_2O$  toward BPAF, BPB, and BPZ in the full titration concentrations.

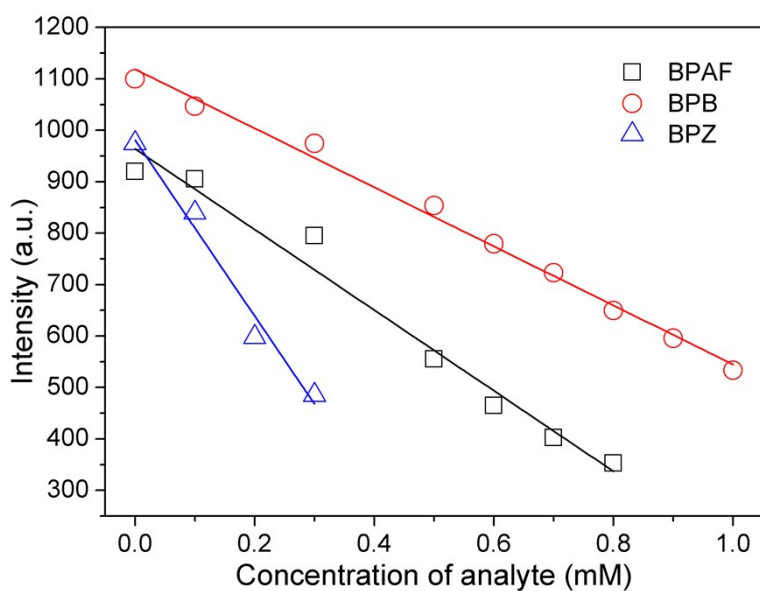

|                                                         | BPAF          | BPB           | BPZ           |
|---------------------------------------------------------|---------------|---------------|---------------|
| Blank reading 1                                         | 913.7         | 1104          | 972.2         |
| Blank reading 2                                         | 915.4         | 1098          | 975.8         |
| Blank reading 3                                         | 920.6         | 1097          | 976.5         |
| Blank reading 4                                         | 920.7         | 1098          | 976.0         |
| Blank reading 5                                         | 920.3         | 1100          | 974.6         |
| <b>Standard deviation (<math>\sigma</math>)</b>         | <b>3.335</b>  | <b>2.793</b>  | <b>1.724</b>  |
| <b> Slope  (<math>k</math>), <math>mM^{-1}</math></b>   | <b>783.79</b> | <b>573.96</b> | <b>1709.3</b> |
| $R^2$                                                   | 0.97164       | 0.99243       | 0.97074       |
| <b>LOD (<math>3\sigma/k</math>), <math>\mu M</math></b> | <b>12.8</b>   | <b>14.6</b>   | <b>3.0</b>    |

**Fig. S7** Linear plots of luminescence intensity against concentration of analyte (BPAF, BPB, and BPZ) for  $1 \cdot 2H_2O$  in  $H_2O$  suspensions in the low concentration region at room temperature when excited at  $\lambda_{ex} = 340$  nm.

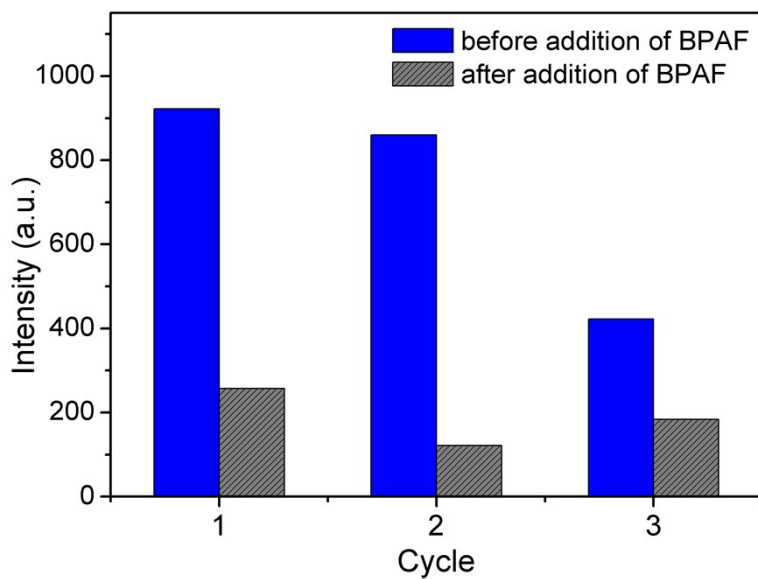

**Fig. S8** Reusability of  $1 \cdot 2\text{H}_2\text{O}$  for luminescence detection of BPAF in  $\text{H}_2\text{O}$  for 3 cycles.

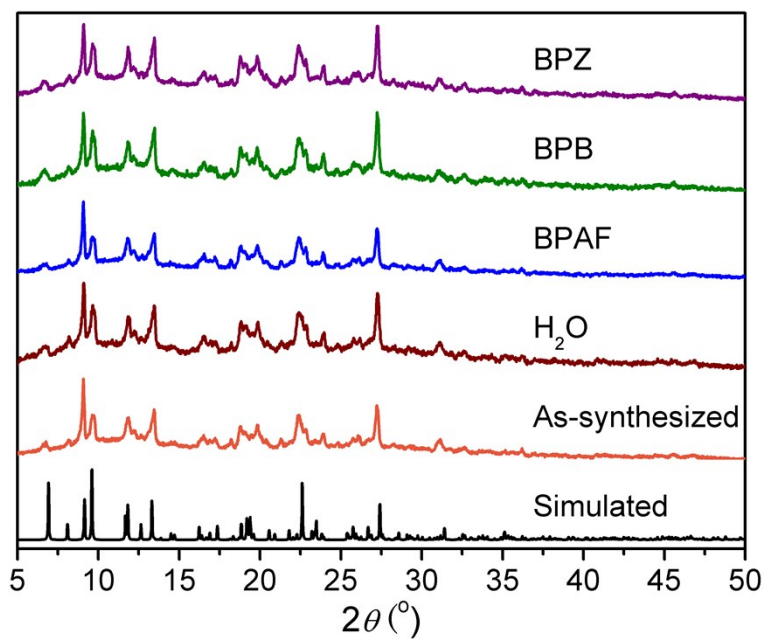

**Fig. S9** PXR D patterns of  $1 \cdot 2\text{H}_2\text{O}$  before and after treated with BPAF, BPB, and BPZ in water for 24 h.

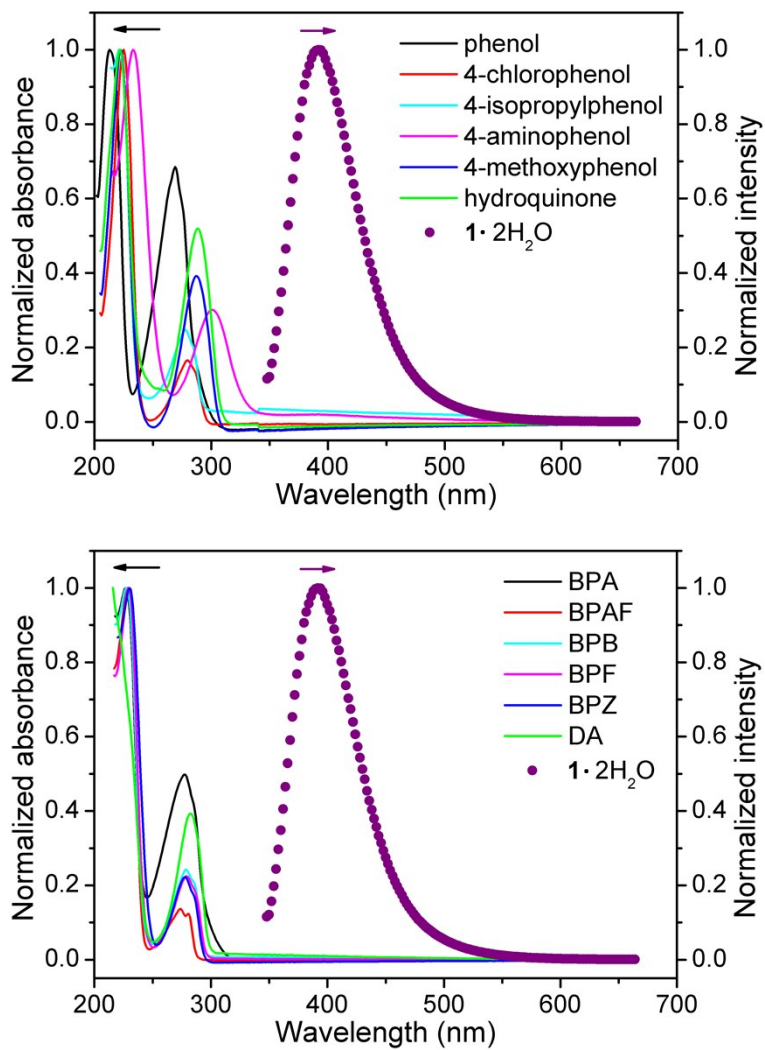

**Fig. S10** Normalized absorption spectra of phenolic analytes in aqueous solutions (solid lines) and normalized emission spectrum of  $1 \cdot 2H_2O$  in  $H_2O$  suspension (dotted curve), showing no spectral overlap.



**Table S1.** Hydrogen-bonding parameter (Å, °) for  $1 \cdot 2\text{H}_2\text{O}$ 

| D–H···A                                                        | <i>d</i> (D–H) | <i>d</i> (H···A) | <i>d</i> (D···A) | <D–H···A | Symmetry code         |
|----------------------------------------------------------------|----------------|------------------|------------------|----------|-----------------------|
| Between the Hpybim ligands and the lattice water molecules     |                |                  |                  |          |                       |
| N2–H2A···O12                                                   | 0.88           | 2.06             | 2.944(7)         | 180      |                       |
| Between the phosphonate groups themselves                      |                |                  |                  |          |                       |
| O3–H101···O2                                                   | 0.84           | 1.73             | 2.564(5)         | 173      | $1 - x, 1 - y, 1 - z$ |
| O6–H102···O3                                                   | 0.84           | 2.02             | 2.790(6)         | 152      | $1 - x, 1 - y, 1 - z$ |
| O8–H103···O4                                                   | 0.84           | 1.72             | 2.522(6)         | 160      | $x, 1 + y, z$         |
| O9–H104···O2                                                   | 0.84           | 1.70             | 2.506(6)         | 159      | $1 - x, 1 - y, 1 - z$ |
| Between the aqua ligands and the phosphonate groups            |                |                  |                  |          |                       |
| O10–H105···O5                                                  | 0.83           | 1.85             | 2.663(6)         | 167      | $1 - x, 1 - y, 1 - z$ |
| O10–H106···O5                                                  | 0.83           | 1.95             | 2.730(6)         | 158      | $-1 + x, y, -1 + z$   |
| O11–H107···O4                                                  | 0.83           | 1.96             | 2.778(6)         | 170      | $-1 + x, y, -1 + z$   |
| Between the lattice water molecules and the phosphonate groups |                |                  |                  |          |                       |
| O12–H109···O7                                                  | 0.83           | 2.00             | 2.825(6)         | 175      | $2 - x, 1 - y, 1 - z$ |
| O12–H110···O4                                                  | 0.82           | 2.07             | 2.888(6)         | 171      | $x, y, -1 + z$        |
| Between the aqua ligands and the lattice water molecules       |                |                  |                  |          |                       |
| O11–H108···O12                                                 | 0.83           | 1.91             | 2.730(6)         | 176      | $1 - x, -y, -z$       |

**Table S2.** Comparison on three-component metal phosphonates incorporating secondary auxiliary N,N-heterocyclic chelators

| Compound                                                                                                                        | Phosphonate                                                                          | N,N-chelator                                                                         | Structure properties             | ref            |    |
|---------------------------------------------------------------------------------------------------------------------------------|--------------------------------------------------------------------------------------|--------------------------------------------------------------------------------------|----------------------------------|----------------|----|
| $[\text{Cd}_2(\text{H}_4\text{tpmm})_2(\text{Hpybim})_2(\text{H}_2\text{O})_4] \cdot 2\text{H}_2\text{O}$ (1·2H <sub>2</sub> O) | 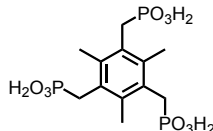   | Hpybim                                                                               | 0D M <sub>2</sub> L <sub>2</sub> | This work      |    |
| $[\text{Cu}_2(\text{H}_4\text{tpmm})_2(2,2'\text{-bipy})_2(\text{H}_2\text{O})_2] \cdot \text{H}_2\text{O}$                     |    | 2,2'-bipy                                                                            | 0D M <sub>2</sub> L <sub>2</sub> | S1             |    |
| $[\text{Ni}_2(\text{H}_4\text{tpmm})_2(2,2'\text{-bipy})_2(\text{H}_2\text{O})_4]$                                              |                                                                                      | 2,2'-bipy                                                                            | 0D M <sub>2</sub> L <sub>2</sub> | S1             |    |
| $[\text{Co}_2(\text{H}_4\text{tpmm})_2(2,2'\text{-bipy})_2(\text{H}_2\text{O})_4]$                                              |                                                                                      | 2,2'-bipy                                                                            | 0D M <sub>2</sub> L <sub>2</sub> | S1             |    |
| $[\text{Cu}_2(\text{H}_4\text{bmt})_2(2,2'\text{-bipy})_2(\text{H}_2\text{O})_4]$                                               |    | 2,2'-bipy                                                                            | 0D M <sub>2</sub> L <sub>2</sub> | S2             |    |
| $[\text{Cd}_2(\text{H}_4\text{bmt})_2(2,2'\text{-bipy})_2] \cdot 4\text{H}_2\text{O}$                                           |                                                                                      | 2,2'-bipy                                                                            | 0D M <sub>2</sub> L <sub>2</sub> | S3             |    |
| $[\text{Zn}(\text{H}_4\text{bmt})(2,2'\text{-bipy})]_n$                                                                         |                                                                                      | 2,2'-bipy                                                                            | 1D chain                         | S3             |    |
| $[\text{Co}_2(\text{H}_6\text{tpmb})_2(2,2'\text{-bipy})_2(\text{H}_2\text{O})_2]$                                              |    | 2,2'-bipy                                                                            | 0D M <sub>2</sub> L <sub>2</sub> | S4             |    |
| $[\text{Zn}_2(\text{H}_6\text{tpmb})_2(2,2'\text{-bipy})_2]$                                                                    |                                                                                      | 2,2'-bipy                                                                            | 0D M <sub>2</sub> L <sub>2</sub> | S4             |    |
| $[\text{Co}_2(\text{H}_4\text{tpmb})(\text{phen})_2(\text{H}_2\text{O})_6] \cdot 2\text{H}_2\text{O}$                           |                                                                                      | phen                                                                                 | 0D M <sub>2</sub> L              | S5             |    |
| $[\text{Ni}_2(\text{H}_4\text{tpmb})(\text{phen})_2(\text{H}_2\text{O})_6] \cdot 2\text{H}_2\text{O}$                           |                                                                                      | phen                                                                                 | 0D M <sub>2</sub> L              | S5             |    |
| $[\text{Co}_2(\text{H}_6\text{tpmb})_2(\text{phen})_2(\text{H}_2\text{O})_2]$                                                   |                                                                                      | phen                                                                                 | 0D M <sub>2</sub> L <sub>2</sub> | S5             |    |
| $\{[\text{Cu}(\text{H}_2\text{MDPA})(\text{phen})] \cdot \text{H}_2\text{O}\}_n$                                                |    | phen                                                                                 | 1D chain                         | S6             |    |
| $[\text{Cu}_2(\text{H}_2\text{EDPA})_2(\text{phen})_2(\text{H}_2\text{O})_4]_n$                                                 |   | phen                                                                                 | 1D chain                         | S6             |    |
| $[\text{Co}_2(\text{H}_2\text{EDPA})_2(\text{phen})_2(\text{H}_2\text{O})_4]_n$                                                 |                                                                                      | phen                                                                                 | 1D chain                         | S6             |    |
| $[\text{Mn}(\text{H}_2\text{EDPA})(2,2'\text{-bipy})(\text{H}_2\text{O})_2]_n$                                                  |                                                                                      | 2,2'-bipy                                                                            | 1D chain                         | S6             |    |
| $[\text{Zn}(\text{H}_2\text{EDPA})(2,2'\text{-bipy})]_n$                                                                        |                                                                                      | 2,2'-bipy                                                                            | 2D layer                         | S6             |    |
| $[\text{Cu}_2(\text{H}_2\text{EDPA})_2(2,2'\text{-bipy})_2(\text{H}_2\text{O})_2] \cdot 3\text{H}_2\text{O}$                    |                                                                                      | 2,2'-bipy                                                                            | 0D M <sub>2</sub> L <sub>2</sub> | S7             |    |
| $[\text{Cu}_2(\text{EDPA})(\text{phen})_2(\text{H}_2\text{O})_2] \cdot 9\text{H}_2\text{O}$                                     |                                                                                      | phen                                                                                 | 0D M <sub>2</sub> L              | S8             |    |
| $[\text{Cu}(\text{HPAA})(2,2'\text{-bipy})(\text{H}_2\text{O})] \cdot \text{H}_2\text{O}$                                       |                                                                                      |  | 2,2'-bipy                        | mononuclear ML | S7 |
| $[\text{Cu}(\text{H}_2\text{EDP})(2,2'\text{-bipy})(\text{H}_2\text{O})] \cdot 2\text{H}_2\text{O}$                             |                                                                                      |  | 2,2'-bipy                        | mononuclear ML | S7 |
| $[\text{CuCl}(\text{H}_3\text{ALE})(2,2'\text{-bipy})] \cdot 4\text{H}_2\text{O}$                                               |  | 2,2'-bipy                                                                            | mononuclear ML                   | S7             |    |

|                                                                                                                         |                                                                                    |           |                                  |     |
|-------------------------------------------------------------------------------------------------------------------------|------------------------------------------------------------------------------------|-----------|----------------------------------|-----|
| $[\text{CuCl}(\text{H}_3\text{PAM})(2,2'\text{-bipy})(\text{H}_2\text{O})] \cdot \text{H}_2\text{O}$                    | 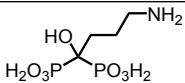 | 2,2'-bipy | mononuclear ML                   | S7  |
| $[\text{Cu}_2(\text{VPA})_2(\text{phen})_2(\text{H}_2\text{O})_2] \cdot 8\text{H}_2\text{O}$                            |  | phen      | 0D M <sub>2</sub> L <sub>2</sub> | S9  |
| $[\text{Cu}_6(\text{C}_5\text{H}_9\text{PO}_3)_4(2,2'\text{-bipy})_6(\text{MeOH})_4](\text{ClO}_4)_4$                   |  | 2,2'-bipy | 0D M <sub>6</sub> L <sub>4</sub> | S10 |
| $[\text{Cu}_3(\text{C}_5\text{H}_9\text{PO}_3)_2(2,2'\text{-bipy})_3(\text{MeOH})(\text{H}_2\text{O})](\text{ClO}_4)_2$ |                                                                                    | 2,2'-bipy | 0D M <sub>3</sub> L <sub>2</sub> | S11 |

*Abbreviation:* Hpybim = 2-(2-pyridyl)benzimidazole; 2,2'-bipy = 2,2'-bipyridine; phen = 1,10-phenanthroline; H<sub>6</sub>tpmm = 2,4,6-tris(phosphorylmethyl)mesitylene; H<sub>6</sub>bmt = benzene-1,3,5-triyltris(methylene)triphosphonic acid; H<sub>8</sub>tpmb = 1,2,4,5-tetrakis(phosphorylmethyl)benzene; H<sub>4</sub>MDPA = methanediphosphonic acid; H<sub>4</sub>EDPA = 1,2-ethanediphosphonic acid; H<sub>3</sub>PAA = hydroxyphosphonoacetic acid; H<sub>4</sub>EDP = hydroxyethylidene-diphosphonic acid; H<sub>4</sub>PAM = pamidronic acid; H<sub>4</sub>ALE = alendronic acid; H<sub>2</sub>VPA = vinylphosphonic acid; C<sub>5</sub>H<sub>9</sub>PO<sub>3</sub>H<sub>2</sub> = cyclopentyl phosphonic acid.

## References

- S1 H.-L. Sung, T.-M. Her, K. Lin, J.-J. Hong and Z.-Y. Wang, Metal ion dominated ligand conformation variations on phosphonate bridged dinuclear complexes, *Inorg. Chim. Acta*, 2017, **466**, 370–375.
- S2 L. Feng, H. Zhou, H. Xu, W. Huang and T. Zeng, Fe(III) and Cu(II) coordination polymers assembled from di/trisphosphonic acid and auxiliary ligands: Structure, SOD-like activity and magnetic behavior, *J. Solid State Chem.*, 2018, **266**, 83–92.
- S3 L. Feng, W.-T. Huang, H.-L. Xu, H. Zhou and Z.-Q. Pan, Structural and fluorescent diversities of Cd(II)/Zn(II) phosphonates with varying auxiliary ligands, *J. Solid State Chem.*, 2019, **270**, 104–111.
- S4 H.-L. Sung, Z.-J. Hu, C.-Y. Chen and J.-Y. Wu, Thermally Stable Dinuclear Co(II) and Zn(II) Complexes of Tetra-phosphonate and 2,2'-Bipyridine, *Inorg. Chim. Acta*, 2020, **510**, 119750.
- S5 H.-L. Sung, W.-P. Weng, S.-F. Lin, H.-C. Yang and J.-Y. Wu, Temperature-Influenced  $M_2L$  and  $M_2L_2$  Molecular Metal Phosphonates and Diversity of Ligand Conformation, *Inorg. Chim. Acta*, 2021, **514**, 119998.
- S6 K. D. Demadis, Z. Anagnostou, A. Panera, G. Mezei, M. V. Kirillova and A. M. Kirillov, Three-component 1D and 2D metal phosphonates: structural variability, topological analysis and catalytic hydrocarboxylation of alkanes, *RSC Adv.*, 2017, **7**, 17788–17799.
- S7 K. D. Demadis, A. Panera, Z. Anagnostou, D. Varouhas, A. M. Kirillov and I. Císařvá, Disruption of “Coordination Polymer” Architecture in  $Cu^{2+}$  Bis-Phosphonates and Carboxyphosphonates by Use of 2,2'-Bipyridine as Auxiliary Ligand: Structural Variability and Topological Analysis, *Cryst. Growth Des.*, 2013, **13**, 4480–4489.
- S8 R. C. Finn and J. Zubieta, The synthesis and characterization of two new copper phosphonates: the one-dimensional  $[Cu(terpy)(HO_3PCH_2CH_2PO_3H)] \cdot 4H_2O$  and the molecular  $[\{Cu(phen)(H_2O)\}_2(O_3PCH_2CH_2PO_3)] \cdot 9H_2O$  (terpy = 2,2':6',2''-terpyridine, phen = 1,10-phenanthroline), *Inorg. Chim. Acta*, 2002, **332**, 191–194.
- S9 E. Armakola, R. M. P. Colodrero, M. Bazaga-García, I. R. Salcedo, D. Choquesillo-Lazarte, A. Cabeza, M. V. Kirillova, A. M. Kirillov and K. D. Demadis, Three-Component Copper-Phosphonate-Auxiliary Ligand Systems: Proton Conductors and Efficient Catalysts in Mild Oxidative Functionalization of Cycloalkanes, *Inorg. Chem.*, 2018, **57**, 10656–10666.
- S10 V. Chandrasekhar, T. Senapati and E. C. Sañudo, Synthesis, Structure, and Magnetism of Hexanuclear Copper(II) Phosphonates, *Inorg. Chem.*, 2008, **47**, 9553–9560.
- S11 V. Chandrasekhar, T. Senapati, E. C. Sañudo and R. Clérac, Tri-, Tetra-, and Hexanuclear Copper(II) Phosphonates Containing N-Donor Chelating Ligands: Synthesis, Structure, Magnetic Properties, and Nuclease Activity, *Inorg. Chem.*, 2009, **48**, 6192–6204.
